# Supplementary material
Source: Research Square preprint supplement (doi:10.21203/rs.3.rs-9857991/v1)
Supplement: Supplementary file 1 [file a4aa33238e4a25e5b5fce5e1.docx]

# Appendix

Included speech features and their description

| **No.** | **Speech feature** | **Description (and example, if necessary)** | **Video examples (if publicly available)** |
| --- | --- | --- | --- |
| 1. | Distorted vowels | Vowel sounds are so deviant that it is difficult to understand the child. What counts as a deviant vowel sound depends on the language examined and how much variation in vowel pronunciation is licensed in everyday speech. | <https://www.youtube.com/watch?v=03VfMujZrfw> |
| 2. | Imprecise consonants | Consonants may be slurred, indistinct, or poorly articulated. The production may include incomplete closures (imprecise stops or fricatives), distorted place or manner of articulation, or overlapping or merging of consonantal features. | <https://www.youtube.com/shorts/4GV_tt--gD4> |
| 3. | Consonant assimilation | Consonants that are not well articulated because they are affected by their neighbouring phoneme, typically in place, manner, or voicing, in order to ease articulation. For example, the /s/ in "bags" changes to /z/. |  |
| 4. | Deviant voicing | Incorrect use of voicing or aspiration. Example: saying "pat" with a voiced /p/ sound, making it sound like “bat." |  |
| 5. | Consonant-cluster segmentation | Breaking up a consonant cluster into separate sounds.  Example: pronouncing "spoon" as "s-poon." |  |
| 6. | Consonant-cluster reduction | One or more consonant sounds in a cluster (a sequence of two or more adjacent consonants within a word) are omitted  Example: pronouncing "spoon" as “poon." |  |
| 7. | Omitted phonemes | One or more phonemes are omitted from a word.  Example: pronouncing *“cat”* as “ca”. |  |
| 8. | Omitted syllables | One or more phonemes are omitted from a word.  Example: pronouncing *broccoli* as *bcoli* |  |
| 9. | Sequencing errors | Misordering of sounds in a word. Example: "*animal*" pronounced as "*aminal*." |  |
| 10. | Irregular articulatory breakdowns | Unlike consistent errors - where the same sound is always produced incorrectly - irregular breakdowns are nonsystematic breakdowns in accuracy of articulation. It affects different sounds at different times and may change within or across utterances, resulting in variable speech intelligibility.  Example: Red truck:  wed tuck  Wed duck  Red duck  Red truck |  |
| 11. | Self-correction | Correcting the mispronounced word:  Danny saw a wed truck, a red truck |  |
| 12. | Excess and equal stress | There is excess stress on usually unstressed parts of speech (such as unstressed syllables in polysyllabic words, e.g. grammatical endings, or monosyllabic function words such as articles, pronouns and auxiliaries), leading to equal stress. Without the normal alternation between stressed and unstressed syllables, the perceptual impression is monotonous.  Note that the child can, of course, stress usually unstressed parts of speech for pragmatic reasons of emphasis (e.g., ‘SHE ‘ate the ‘cake instead of She ‘ate the ‘cake or We ‘HAD ‘crossed the ‘bridge instead of We had ‘crossed the ‘bridge). Such stress used for pragmatic emphasis is normal and does not count as excess and equal stress. |  |
| 13. | Prolonged phonemes | There are prolongations of phonemes.  This is a motor-speech parameter. If it’s clear that the child hesitates for semantic reasons, e.g., searching for words or wondering how to describe a scene, this hesitation does not count as exhibiting prolonged phonemes. |  |
| 14. | Prolonged intervals | Prolonged intervals between syllables and/or words within the same utterance.  Long pauses between utterances do not count as prolonged intervals.  This is a motor-speech parameter. If it’s clear that the child hesitates for semantic reasons, e.g., searching for words or wondering how to describe a scene, this hesitation does not count as exhibiting prolonged intervals. |  |
| 15. | Slow rate | The child speaks noticeably slowly, e.g., because of prolonged phonemes, prolonged intervals or a combination of both. (The child’s overall speech rate may also be characterized as slow, even if neither phonemes nor intervals on their own are characterized as prolonged).  Slow rate is assessed per intuition, not by measuring segments per second. |  |
| 16. | Monopitch | The voice sounds monotone, staying at one pitch level. It may sound like a depressed voice. The pitch level may also be unusual (too high or too low), suggesting that the child is not able to control pitch flexibly. |  |
| 17. | Reduced loudness | Insufficient loudness. The child does not achieve normal voice loudness and speaks with too low a volume. | https://iowaprotocols.medicine.uiowa.edu/protocols/slide-05d-bilateral-vocal-cord-paralysis-dysphonia-and-dysphagia |
| 18. | Leaky voice | Air escapes during phonation, creating a breathy sound, similar to whispering. |  |
| 19. | Hoarseness | A hoarse voice is characterized by roughness and rasp. It can carry both strained and breathy qualities. It is caused by vocal fold irregularities. | https://www.youtube.com/watch?v=zhXbqCp0oac |
| 20. | Strained voice | A tight, tense, or squeezed voice due to excessive muscular tension, especially around the glottis. In its most severe degree, the voice sounds strained or strangled as if the child squeezes out speech through the glottis with effort. | https://www.youtube.com/watch?v=1gqAGauWj4U |
| 21. | Hypernasality | Excessive nasal resonance, causing non-nasal phonemes to be produced with a nasal feature. | https://www.youtube.com/watch?v=KWz5_fpnZYc |
| 22. | Short phrases (insufficient coordination between respiration and phonation) | Phrases are short because the child cannot control airflow while speaking and runs out of air. It may sound as if the child is out of breath; there may be more inspirations than you would expect, there may be gasps at the end of phrases, and the child may speak while inhaling.  Note that Short phrases is NOT a grammatical measure in this study. A child may speak in short phrases for grammatical or other reasons, but to score a Yes on this parameter, there must be manifest audible cues that the child speaks in short phrases due to insufficient coordination between respiration and phonation. | https://www.youtube.com/watch?v=zhXbqCp0oac |
| 23. | Stuttering | Stuttering is an abnormally high frequency and/or duration of disfluencies in speech. These disfluencies usually take the form of (a) repetitions of sounds, syllables, or one-syllable words, (b) prolongations of sounds, or (c) “blockages” of airflow or voicing. If any of these disfluencies occur in the sample, it will be regarded as stuttering. |  |
